# Supplementary material for: Tumorigenicity-associated characteristics of human iPS cell lines
Source: PubMed Central journal article supplement (PMC6171902; doi:10.1371/journal.pone.0205022), 2018-10-04

201B7

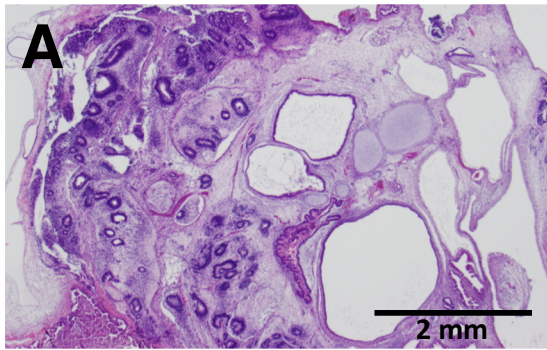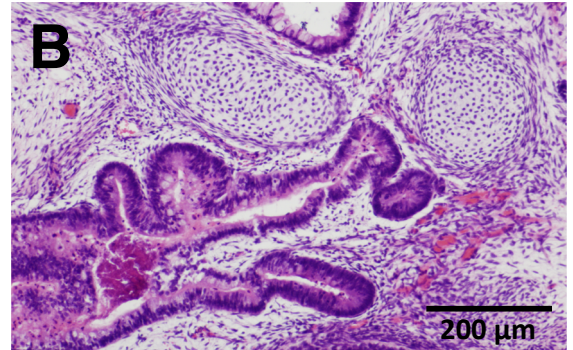

253G1

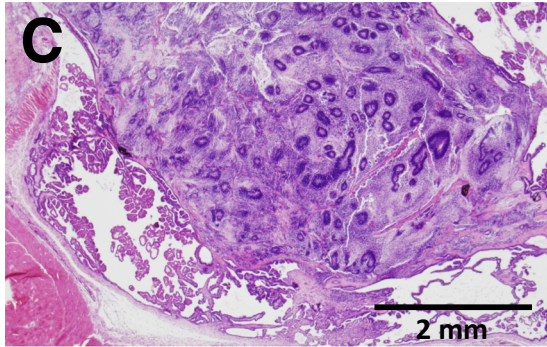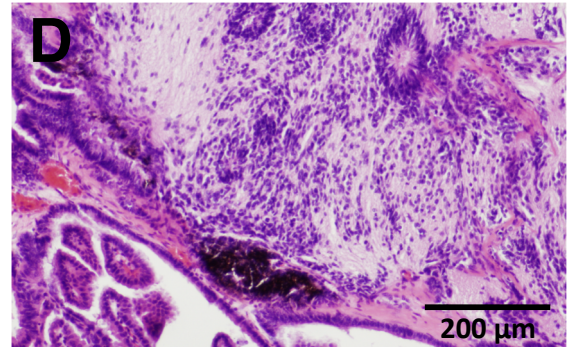

409B2

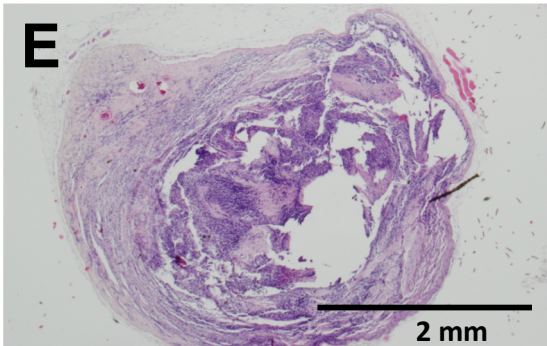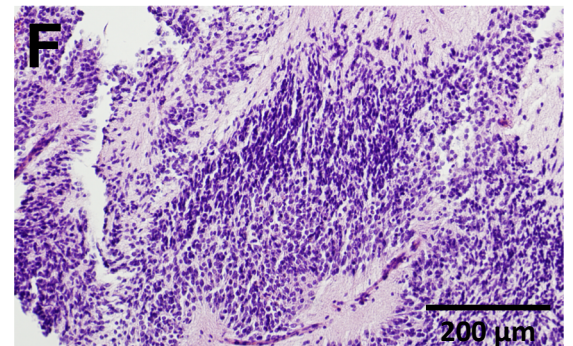

454E2

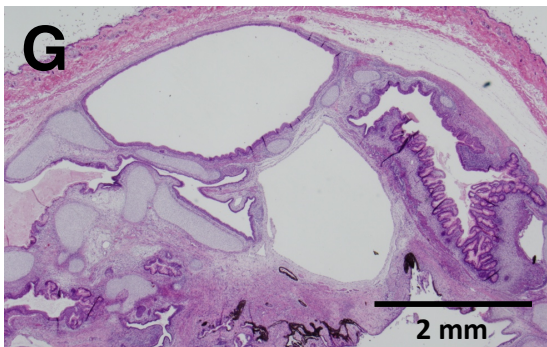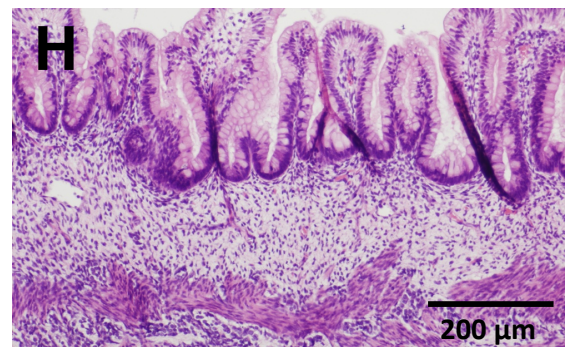

HiPS-  
RIKEN-  
1A

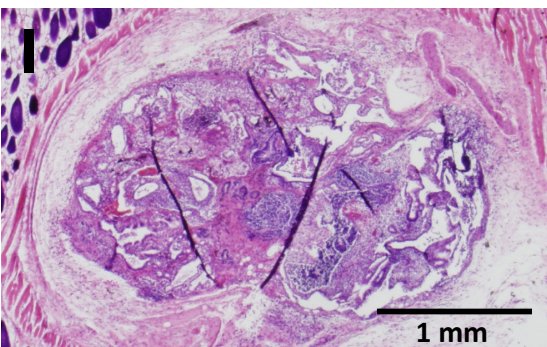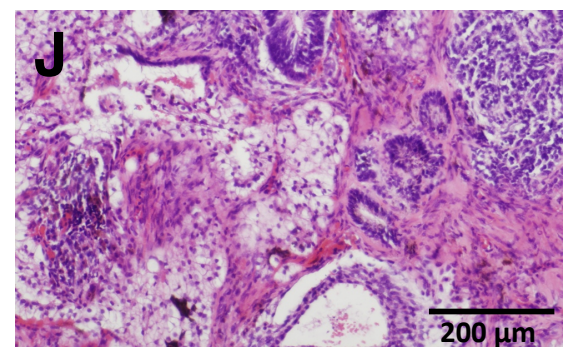



**HiPS-  
RIKEN-  
2A**

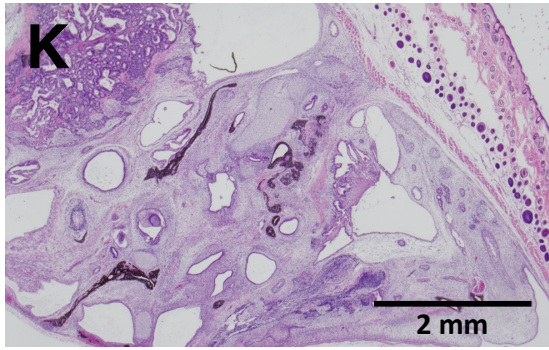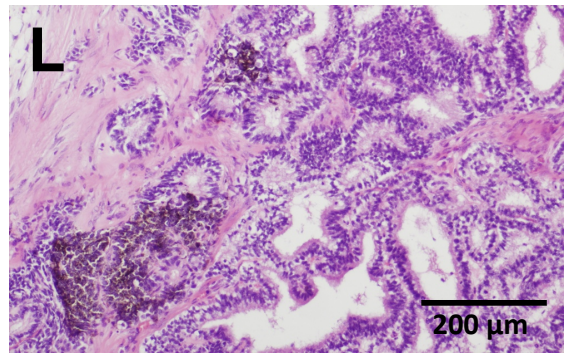

**HiPS-  
RIKEN-  
12A**

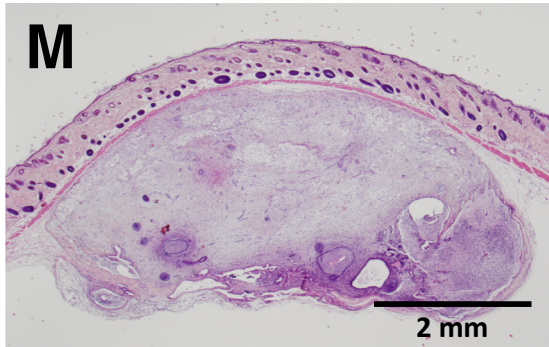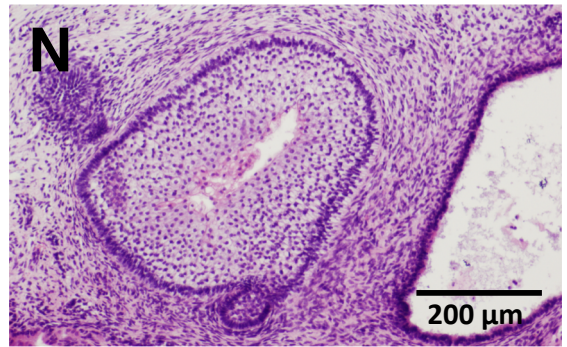

**ATCC-  
DYR  
0100**

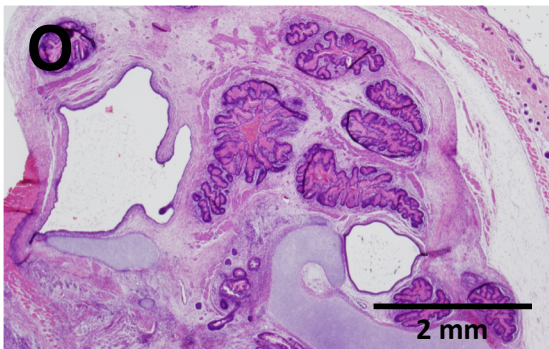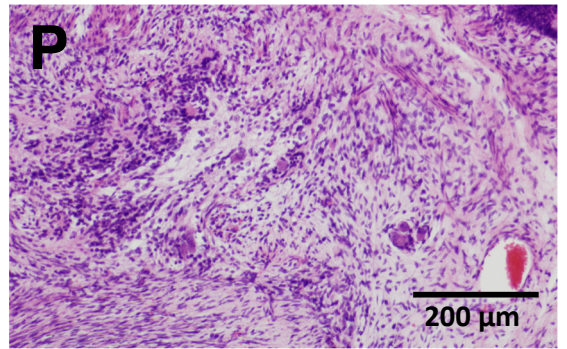

**ATCC-  
HYR  
0103**

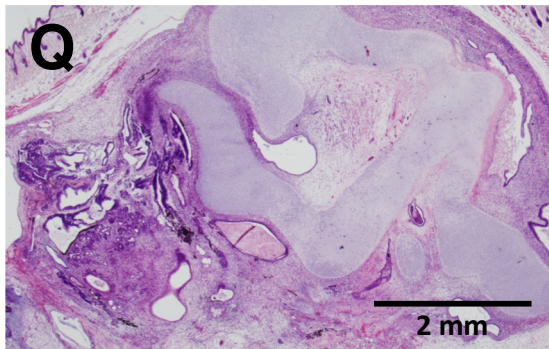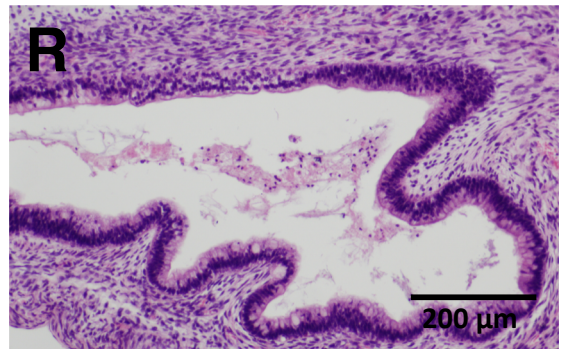

**mc-iPS**

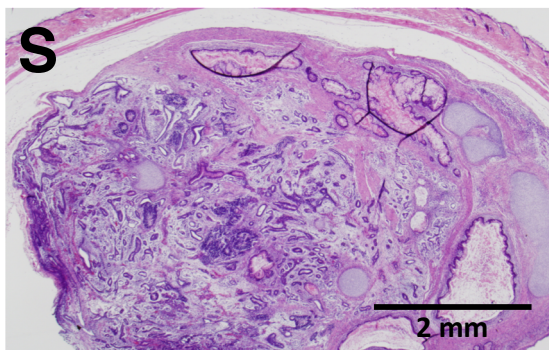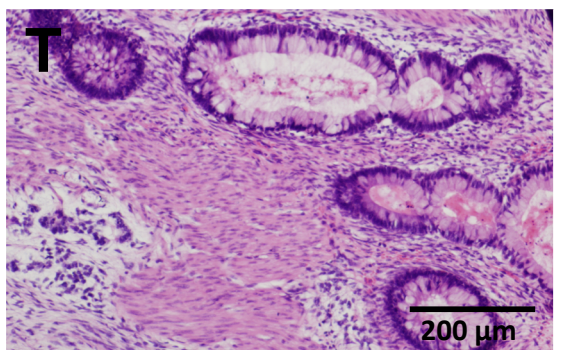

Supplement: pone.0205022.s008.pdf [file pone.0205022.s008.pdf]
